# Supplementary material for: Discovery of Avian Paramyxoviruses APMV-1 and APMV-6 in Shorebirds and Waterfowl in Southern Ukraine
Source: Preprints.org preprint supplement (doi:10.20944/preprints202206.0322.v1), 2022-06-23
Supplement: Supplementary file 2 [file TableS5_APMV_TilingPrimers.xlsx]

## Sheet: Table S5. Tiling Primers
Primer Set 1: Developed from NCBI accession AF077761.1
APMV1 (1000 nt region with 50 nt overlap)
APMV1|Mallard|Myt_Kherson|1-4-4-09|2017, APMV1|Mallard|AN_Kherson|TM434778|2002, APMV-1|Mallard|Dr_Kherson|1-3|5-09|2017
Pool 1		Pool 2		Pool 3		Pool 4
Primer Name	Sequence	Primer Name	Sequence	Primer Name	Sequence	Primer Name	Sequence
APMV1_1000nt_1_F	ACCAAACAGAGAATCCGTGAGTT	APMV1_1000nt_9_F	ACTGAGACCACAATTATGAACGCA	APMV1_1000nt_2_F	AGGAATACCGGGCTTACTGCAT	APMV1_1000nt_10_F	CCGAAGGCAGAATTCTCACAGT
APMV1_1000nt_1_R	TCTTCTGGATGTCGCCTGAGAG	APMV1_1000nt_9_R	TGGCTGTTTTGTTGCTGACTGT	APMV1_1000nt_2_R	AAAGGTGGCCATGTTTGTCCTG	APMV1_1000nt_10_R	CATTCATCAGGAAGCGGTAGCC
APMV1_1000nt_3_F	AGTACGGGTAGAAGAGGGATATTCA	APMV1_1000nt_11_F	AGGGCAGAGCATCAGATTATCCT	APMV1_1000nt_4_F	AGGTTGACTATCAGCTAGATCTTGTCT	APMV1_1000nt_12_F	CCGTCAGGTACATTTGCAGGAG
APMV1_1000nt_3_R	TTGGCTTCCATGACTGCAACAG	APMV1_1000nt_11_R	TTGCATGAGTCACGGATTCTGC	APMV1_1000nt_4_R	CGACAGTGGCTTCTTCATTCCC	APMV1_1000nt_12_R	CGACGGTTCTTGCTTTTCGGAT
APMV1_1000nt_5_F	ATAGGATCCAGCGCCTTGACTT	APMV1_1000nt_13_F	TGCTAGCGATGAGTCAACTGTC	APMV1_1000nt_6_F	GGTGGCCAAGATACTCTGGAGT	APMV1_1000nt_14_F	GGGCTTCCCAAAGACTTCTGTT
APMV1_1000nt_5_R	GTGCCCCTTCTCCAGCTTAGTA	APMV1_1000nt_13_R	ACTGATTAAGATCGGGGTGCGA	APMV1_1000nt_6_R	CTCTACACCAACTTGCTGTGCA	APMV1_1000nt_14_R	CGCTGTCACATCTTGTACACCC
APMV1_1000nt_7_F	TATCGCAACTAGCAGTGGCAGT	APMV1_1000nt_15_F	GACGGGAGGCAGGAAAATACTG	APMV1_1000nt_8_F	TCAGTGGGGAATTCGATGTAACTT	APMV1_1000nt_16_F	CCAGTCTGTGGTTTCTTATGATGAAGA
APMV1_1000nt_7_R	TCGAGTTGTTGACATTCCCAAGC	APMV1_1000nt_15_R	GGCGGACCACATCTGAATTCTG	APMV1_1000nt_8_R	ATCTGGGTCATGGATAGGTGCC	APMV1_1000nt_16_R	TCTTGCACATCTTACCTCGGGT
APMV1_1000nt_7_altF	TATCACAACTAGCCGTGGCAGT	APMV1_1000nt_17_F	CGGAGGAAGACTACTTAGTACGATACT	APMV1_1000nt_8_altF1	TCAGTGGGGAATTTGATGCAACTT	APMV1_1000nt_18_F	TCCACAAAAGGATATATTCTCTCTAATGGT
APMV1_1000nt_7_altR	TCGAGTTGTTAACATTCCCAAGC	APMV1_1000nt_17_R	TTATGTTCGCTAGCGTGCTCAC	APMV1_1000nt_8_altF2	TCAGTGGAGAATTTGATGCAACTT	APMV1_1000nt_18_R	GTCCTAAGGAGTCAGGGTTCAACT
				APMV1_1000nt_6_altR	TTCTACACCAACCTGCTGTGTA
Primer Set 2: Developed from the alignment of sequences: KT962980 and EF569970
APMV6 (1500 nt region with 50 nt overlap)
APMV-6|Environmental|ND Kherson|41-45|7-08|2017, APMV-6|Mallard|ND Kherson|11-15|4-09|2017
Pool 1		Pool 2		Pool 3		Pool 4
Primer Name	Sequence	Primer Name	Sequence	Primer Name	Sequence	Primer Name	Sequence
APMV6_1500nt_1_F	ACAAGGAAACCATATGCTTGGGG	APMV6_1500nt_9_F	ACTCAAAGTGTTAGCATTCTTTATTGCA	APMV6_1500nt_2_F	CCGCCAGGAGACAGAGAATTGA	APMV6_1500nt_8_F	TGTAGCCTTCCCCGATTCAATCT
APMV6_1500nt_1_R	TCGTTTAGATGTCCAGGCCACT	APMV6_1500nt_9_R	ATTGCCGACACAATTCTCACCC	APMV6_1500nt_2_R	ATTGTTGCTGACCACTTGTCCG	APMV6_1500nt_8_R	TAGAGGTTCTGGAGCAATGGGG
APMV6_1500nt_3_F	CACCAAGCCAGGAATTGTCGTC	APMV6_1500nt_11_F	TGTAATATCTGAAGACCATCTACGTGC	APMV6_1500nt_4_F	AGAAACAAAGTACGGGCCATGG	APMV6_1500nt_10_F	CGAAACGGATCTTCTTTGAGGGG
APMV6_1500nt_3_R	AAGAAACCTAGCGCGTACTTGC	APMV6_1500nt_11_R	CTGCACCTTCTGTGGCATGATT	APMV6_1500nt_4_R	CACCCAGATCAGAGTGTTTGGC	APMV6_1500nt_10_R	GCGGGAGTGAACTTCGTTACAC
APMV6_1500nt_5_F	GCACTGTGTTTGGATCGCAGAT	APMV6_1500nt_13_F	TCAGGGGCCATTATGACTGTGA	APMV6_1500nt_6_F	GGACTTGTTGACATCCTCAGAAATAAAG	APMV6_1500nt_12_F	ACCTTGAACTAAAAGAACTCACCCC
APMV6_1500nt_5_R	CGCACCCACTTATTGAGCAAGT	APMV6_1500nt_13_R	CGGTCTATGGGTGATTTCGGGA	APMV6_1500nt_6_R	TAGGCCAGGGTTGAGTTCAGAC	APMV6_1500nt_12_R	ATCTGTGCAATCTCGCTCTTGC
APMV6_1500nt_7_F	AACGAGGACTACGCTGACCCTA
APMV6_1500nt_7_R	CACAGGTGAGTTGAGATGGCAC
Primer Set 3: Developed from NCBI accession KU601398
APMV1 (1500 nt region with 200 nt overlap)
APMV-1|Grey_Goose|Myt_Kherson|1-4|4-09|2017, APMV-1|Shelduck|Chur_Kherson|1-5|2-11|2017
Pool 1		Pool 2		Pool 3		Pool 4
Primer Name	Sequence	Primer Name	Sequence	Primer Name	Sequence	Primer Name	Sequence
APMV1_1500nt_1_F	TCTGTTTGGTACGATAAAAGGCGA	APMV1_1500nt_7_F	TTTATTGACAACCGCGTGTGGT	APMV1_1500nt_2_F	TGTCTGAGGATACCAGCAGCAT	APMV1_1500nt_8_F	AACTTGGAAGGGCAGTACACCA
APMV1_1500nt_1_R	CGGTGTCATTGTCTTGGGAAGG	APMV1_1500nt_7_R	CTTCTGACCGGGGGACATTACT	APMV1_1500nt_2_R	AACTAGAACTGGGTGGGATCGG	APMV1_1500nt_8_R	TCCCTTCTGCCATCACTTGACA
APMV1_1500nt_3_F	TACCTGTCGACTTTGTGCAAGC	APMV1_1500nt_9_F	TTCCGAGGACCAGAAGAAGCAT	APMV1_1500nt_4_F	GGTCTTCTCAGTAGTGCAGGCA	APMV1_1500nt_10_F	CACACCCTGATTTTAACCAGTCATG
APMV1_1500nt_3_R	CAGAGATTTGACCAACGGGCTC	APMV1_1500nt_9_R	GTATGGGTCGTTGCACAGACTG	APMV1_1500nt_4_R	GGAAGTGATTTGTGGCCCGAAT	APMV1_1500nt_10_R	CAAGTCTCGCAAAGTCACCCTC
APMV1_1500nt_5_F	ACCAAAATGCTGCCAACATCCT	APMV1_1500nt_11_F	TCAAGGAGGGGAACGTGGTTTA	APMV1_1500nt_6_F	TGGCTTGGGAATAATACCCTGGA	APMV1_1500nt_12_F	GCACTATTGTTCCCCCAAGAGC
APMV1_1500nt_5_R	TGAAGACTGCTGTTGGTGATGC	APMV1_1500nt_11_R	TTATACCAAGAGGAGGACGCGG	APMV1_1500nt_6_R	GGTATAGTCAGCACCGGGTCTT	APMV1_1500nt_12_R	ACCTAGGACCGCCTTCAAGTAC
		APMV1_1500nt_13_F	GTGCAAGACACGGGAATTCCTT
		APMV1_1500nt_13_R	ACGAGTCTTAAAGGGTCGGAGT
